# Supplementary material for: Earth-abundant and low-cost CZTS solar cell on flexible molybdenum foil
Source: Royal Society of Chemistry journal article supplement (doi:10.1039/c4ra02064b), 2014-01-01
Supplement: c4ra02064b1.pdf [file c4ra02064b1.pdf]

## Electronic Supplementary Information

Earth-abundant and low-cost CZTS solar cell on flexible molybdenum foil

Yongzheng Zhang<sup>a,b</sup>, Qinyan Ye<sup>b</sup>, Jiang Liu<sup>b</sup>, Hao Chen<sup>b</sup>, Xulin He<sup>b</sup>, Cheng Liao<sup>b\*</sup>,  
Junfeng Han<sup>b</sup>, Hao Wang<sup>a</sup>, Jun Mei<sup>b</sup>, WoonMing Lau<sup>b</sup>

<sup>a</sup> The College of Materials Science and Engineering, Beijing University of Technology, Beijing 100124, PR China

<sup>b</sup> Chengdu Green Energy and Green Manufacturing Technology R&D Centre, Southwest Airport Economic Development Zone, Shuangliu, Chengdu, 610207, P. R. China

\* Corresponding author: Tel: +86-28-67076209, Fax: +86-28-67076210

*E-mail address:* [cliao315@hotmail.com](mailto:cliao315@hotmail.com) (Cheng Liao)

### Characterizations and measurements

X-ray power diffraction (XRD) measurements were carried out on a Shimadzu XRD diffractometer with Cu K<sub>α</sub> radiation. Raman spectra were recorded on a microscopic confocal Raman spectrometer (Labram HR 800) with an excitation of 514 nm laser light. The morphologies and compositions of the samples were observed using a Hitachi S5200 field emission scanning electron microscope (SEM) equipped with Bruker energy dispersive spectroscopy. Current-voltage (*I-V*) measurements were performed using a Keithley 2400 General Purpose Sourcemeater under simulated AM 1.5G illumination (100 mW cm<sup>-2</sup>). External quantum efficiency (EQE) was collected by the EQE Measurement System (Continuous Solar Simulator for PV Cells, Hongming Technology Co., Ltd.).

## Figure Captions

| Sample              | Cu(at%) | Zn(at%) | Sn(at%) | Cu/(Zn+Sn) | Zn/Sn |
|---------------------|---------|---------|---------|------------|-------|
| Cu-Zn-Sn precursors | 43.99   | 30.20   | 25.81   | 0.79       | 1.17  |

The composition ratios of Cu/(Zn + Sn) and Zn/Sn are 0.79 and 1.17 respectively, which yields Cu-poor and Zn-rich.

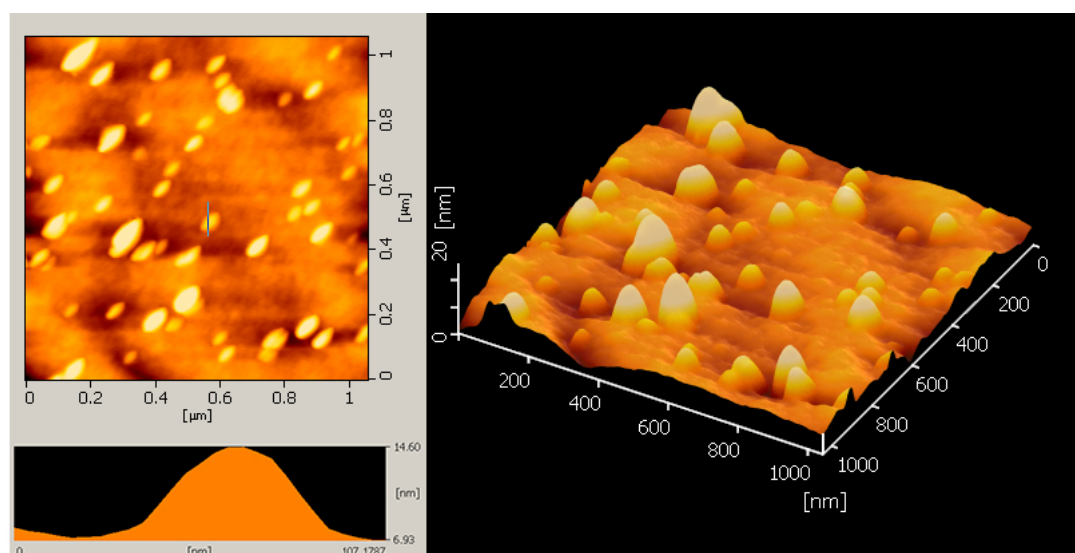

Fig. S1 AFM image of post-polished molybdenum foil.

The surface morphology of foil is found to be smooth with an average roughness of ~10 nm in most regions. An AFM 3D micrograph of foil surface shows that height between lowest feature and highest feature is ~20 nm.

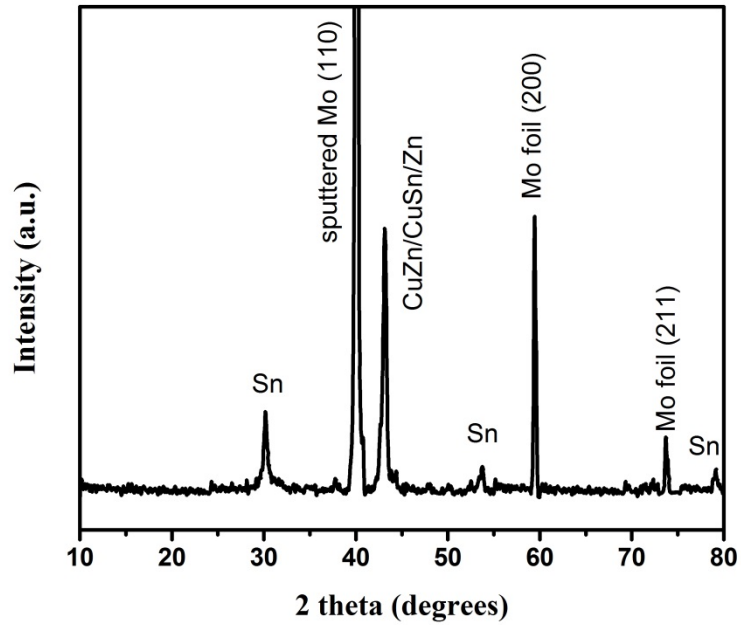

Fig. S2 X-ray powder diffraction (XRD) patterns of Cu-Zn-Sn precursors.

The peaks correspond to alloy phases, where corresponding XRD patterns of Sn, Zn, CuZn, and CuSn phases are observed, which can be confirmed by JCPDS #65-7657, #65-9743, #65-9061, #65-3433 and #52-1228, respectively.
